# Supplementary material for: Impact of perovskite solar cell degradation on the lifetime energy yield and economic viability of perovskite/silicon tandem modules
Source: Royal Society of Chemistry journal article supplement (doi:10.1039/c9se00143c), 2019-01-01
Supplement: c9se00143c1.pdf [file c9se00143c1.pdf]

# Supplementary Information for Impact of Perovskite Solar Cell Degradation on the Lifetime Energy Yield and Economic Viability in Perovskite/Silicon Tandem Modules

Jiadong Qian<sup>a</sup> Marco Ernst<sup>a\*</sup>, Nandi Wu<sup>a</sup> and Andrew Blakers<sup>a</sup>

<sup>a</sup> Research School of Engineering, the Australian National University, Canberra ACT 2600, Australia

Table S1 Electrical properties of two-terminal and four terminal PSK/Si solar cells and the module configuration used for simulation.

|                 | Cell   | J <sub>sc</sub><br>(mA·cm <sup>-2</sup> ) | I <sub>sc</sub> (A) | V <sub>oc</sub> (V) | FF (-) | PCE (%) |
|-----------------|--------|-------------------------------------------|---------------------|---------------------|--------|---------|
| 2T <sup>1</sup> | PSK    | 19.5                                      | 4.77                | 1.05                | 0.68   | 14.1    |
|                 | Si     | 19.5                                      | 4.77                | 0.73                | 0.79   | 11.2    |
|                 | Tandem |                                           |                     |                     |        | 25.3    |
| 4T <sup>2</sup> | PSK    | 21.0                                      | 8.39                | 1.10                | 0.74   | 17.1    |
|                 | Si     | 17.7                                      | 4.32                | 0.67                | 0.80   | 9.6     |
|                 | Tandem |                                           |                     |                     |        | 26.7    |

## Simulation method

### One-diode equation

$$J = J_{ph} - J_0 \left( e^{\frac{V + J \cdot R_s}{nV_T}} - 1 \right) - \frac{V + J \cdot R_s}{R_{sh}}$$

$J$  is the cell current density,  $J_{ph}$  is the photo-generated current density,  $J_0$  is the dark-saturation current,  $V$  is the voltage at the cell,  $R_s$  is the series resistance,  $n$  is the ideality factor at the p-n junction,  $V_T$  is

the thermal voltage calculated as  $\frac{kT}{q}$ , where  $k$  is the Boltzmann constant,  $T$  is the cell temperature and  $q$  is the electron charge,  $R_{sh}$  is the shunt resistance.

### Explicit solution to the one-diode equation using Lambert $W$ function<sup>3</sup>

$$V = (J_{ph} + J_0) \cdot R_{sh} - J \cdot (R_s + R_{sh}) - nV_T W \left[ \frac{R_{sh} J_0}{nV_T} e^{\frac{R_{sh}(J_{ph} + J_0 - J)}{nV_T}} \right]$$

### $V_{oc}$ degradation by degrading $J_0$

$$J_0^t = J_0^0 \cdot r_v$$

$r_v$  is a coefficient to adjust the open-circuit voltage.

### FF degradation by increasing $R_s$

$$R_s^t = R_s^0 \cdot r_{FF}$$

$r_{FF}$  is a coefficient to adjust the fill factor.

### Perovskite cell $J_{sc}$ degradation

$$J_{ph(PSK)}^t = J_{ph(PSK)}^0 (1 - tr_{c(PSK)}) (1 - tr_{encp})$$

$J_{ph(PSK)}^t$  is the photo-generated current at time  $t$  with a current degradation rate of  $r_{c(PSK)}$  of the perovskite cell and annual optical degradation rate of  $r_{encp}$  for the encapsulation.

### Silicon cell $J_{sc}$ degradation

$$J_{ph(Si)}^t = J_{ph(Si)}^0 (1 - tr_{c(Si)}) (1 - tr_{encp}) + f_\tau (J_{ph(PSK)}^0 - J_{ph(PSK)}^0 (1 - tr_{c(PSK)})) \quad (5)$$

$J_{ph(Si)}^t$  is the photo-generated current at time  $t$  with a current degradation rate of  $r_{c(Si)}$  of the perovskite cell and annual optical degradation rate of  $r_{encp}$  for the encapsulation. Coefficient  $f_\tau$  represents the correlation between the current degradation at the perovskite top cell and the current increase at the silicon bottom cell due to increased light transmitted. The coefficient  $f_\tau$  can be calculated as following.

$$f_\tau = \frac{\Delta J_{sc(PSK)}}{\int_{\lambda_{min}}^{\lambda_{max}} \Delta \phi(\lambda) \cdot EQE(\lambda) \cdot d\lambda}$$

$\Delta J_{sc(PSK)}$  is the short-circuit current degradation in the perovskite top cell.  $\Delta \phi(\lambda)$  is the photon flux increase at the silicon bottom cell due to the perovskite optical degradation.  $EQE(\lambda)$  is the spectral external quantum efficiency of the silicon cell.  $\Delta \phi(\lambda)$  can be calculated as:

$$\Delta\phi(\lambda) = \frac{\Delta T(\lambda) \cdot G_{AM1.5g}(\lambda)}{E(\lambda)}$$

$\Delta T(\lambda)$  is the transmittance change of the perovskite cell during degradation, and is measured for a sample cell  $G_{AM1.5g}(\lambda)$  is the AM 1.5g spectral irradiance and  $E(\lambda)$  is the photon energy, which equals to  $\frac{h \cdot c}{\lambda}$ , where  $h$  is Planck's constant and  $c$  is the speed of light.

Table S2 Simulated degradation rates for encapsulation, Si cell and PSK cell.

| Parameter | Degradation rate (%/year) |         |          |       |       |
|-----------|---------------------------|---------|----------|-------|-------|
|           | Encapsulation             | Si cell | PSK cell |       |       |
|           |                           |         | S1       | S2    | S3    |
| $I_{sc}$  | 0.3                       | 0       |          |       |       |
| FF        | 0                         | 0.09    |          |       |       |
| $V_{oc}$  | 0                         | 0.03    |          |       |       |
| $P_{mp}$  | N/A                       | 0.3     | 0-4.7    | 0-4.5 | 0-3.5 |

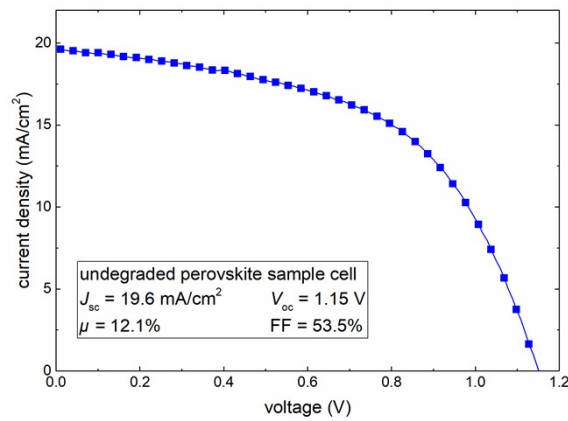

Figure S1 Figure of merit of the perovskite solar cell used for extracting the realistic degradation scenario.

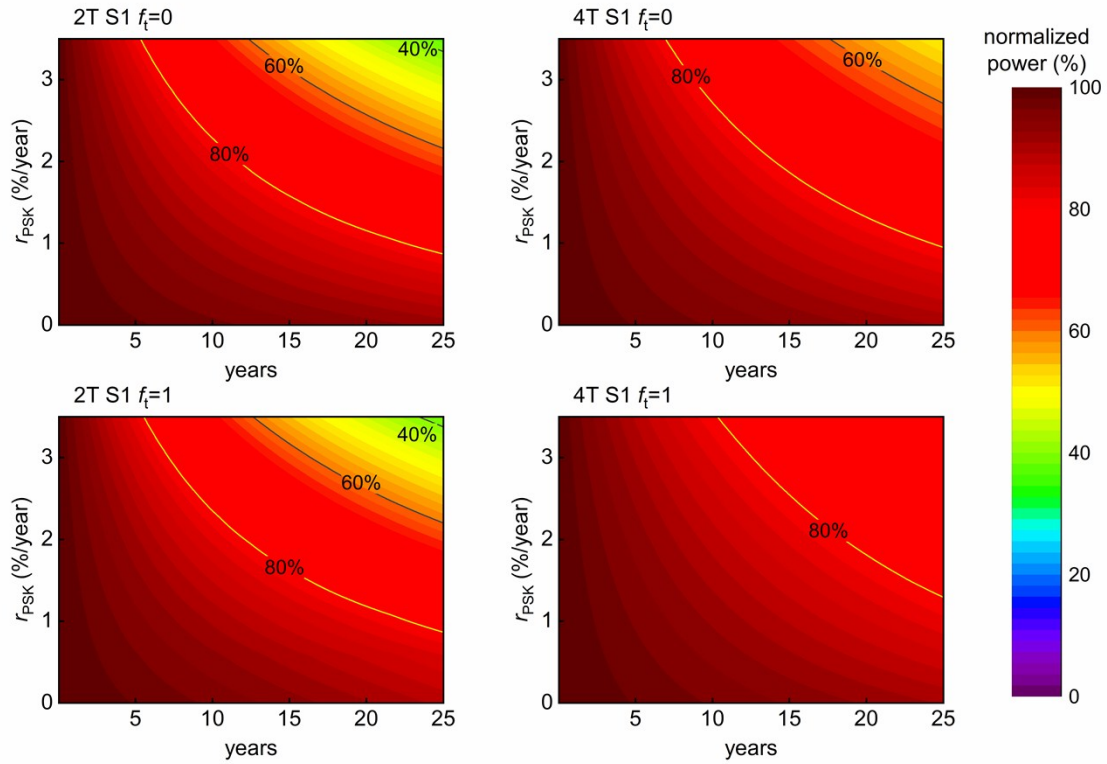

Figure S2 Tandem module power degradation impacted by varying PSK top cell degradation rate over 25 years in Scenario 1, with  $f_{\tau} = 0$  and 1.

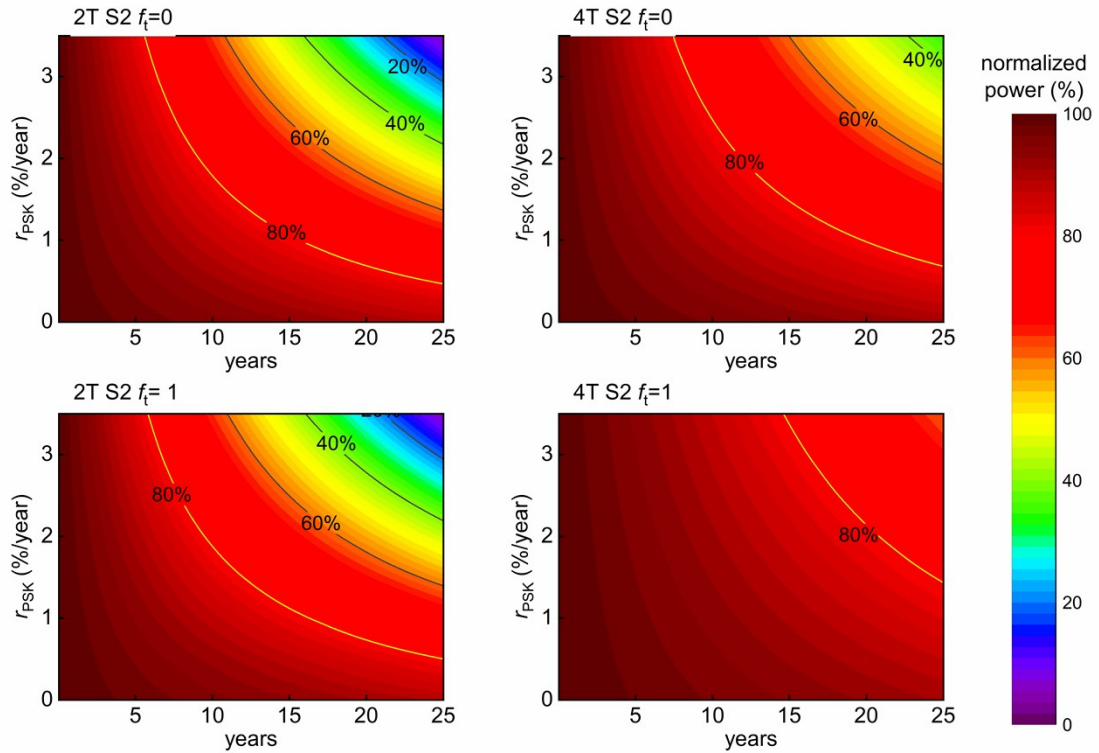

Figure S3 Tandem module power degradation impacted by varying PSK top cell degradation rate over 25 years in Scenario 2, with  $f_{\tau} = 0$  and 1.

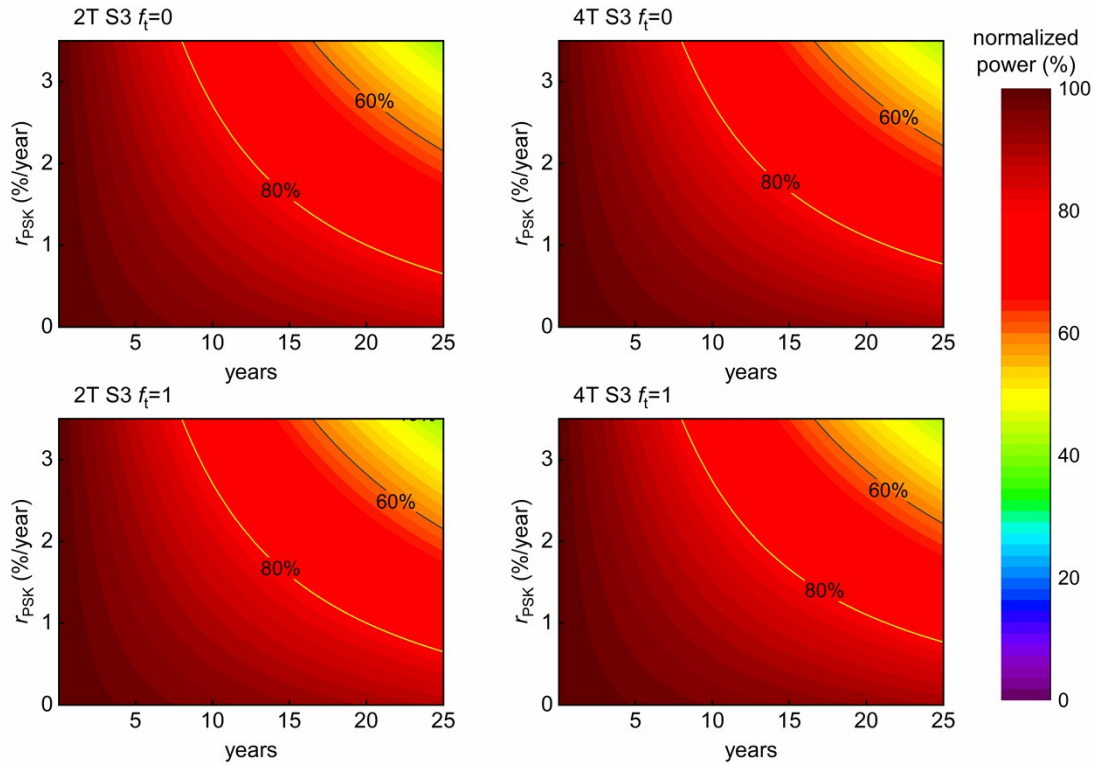

Figure S4 Tandem module power degradation impacted by varying PSK top cell degradation rate over 25 years in S2, with  $f_\tau$  equals to 0 and 1.

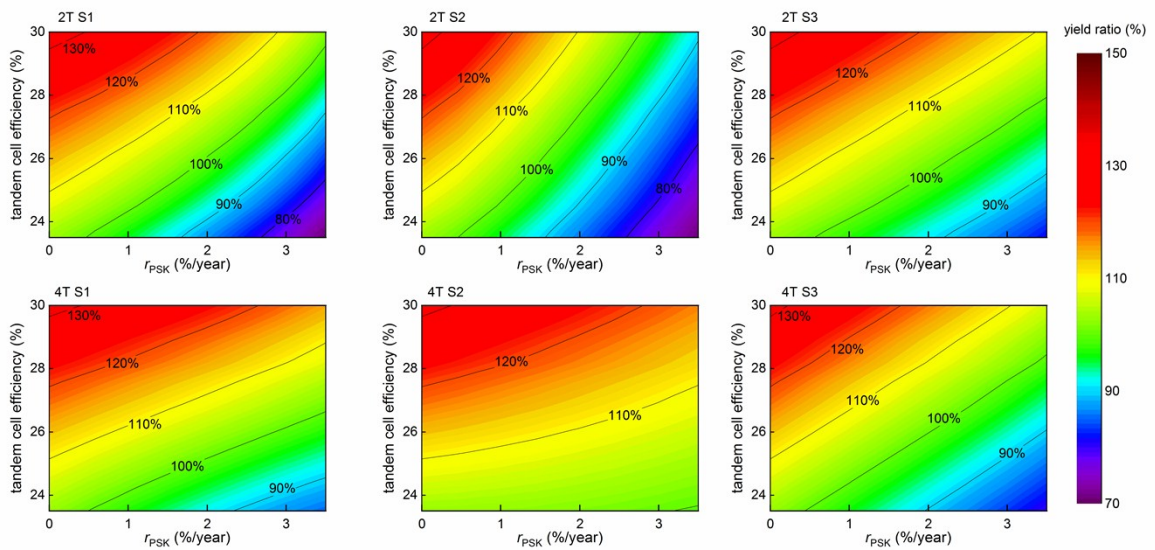

Figure S5 Ratios between the lifetime energy yield of the 2T and 4T tandem modules in S1, S2 and S3 and the projected lifetime energy yield of a 405 W mono c-Si PERC module in 2025. The encapsulation and Si cells in tandem modules and the 2025 PERC modules are assumed to degradation be 0.4%/year. A future energy discount rate of 5%/ year and constant  $f_\tau = 0.89$  is used.

Table S3 Cost components used to simulate the LCOE of PSK/Si tandem modules and the mono c-Si PERC module in 2025.<sup>4</sup>

|                                      |                              |               | Unit Cost   | PERC module in 2025      | PSK/Si tandem module                     |                 |
|--------------------------------------|------------------------------|---------------|-------------|--------------------------|------------------------------------------|-----------------|
| Additional cost of tandem processing |                              |               |             | 0                        | $C_{PSK}$                                |                 |
| Module power                         |                              |               |             | 405                      | $P_{tandem}$                             |                 |
| Category                             |                              | Sub-category  | Cost (\$/W) | Cost (\$/module)         | Cost (\$/module)                         |                 |
| Module type dependent cost           | Capital Cost                 |               |             |                          |                                          |                 |
|                                      | Soft cost                    |               | 0.25        | 101                      |                                          |                 |
|                                      | System cost                  |               |             |                          |                                          |                 |
|                                      | Module                       | encapsulation |             | 0.096                    | 39                                       |                 |
|                                      |                              | Si cell       |             | 0.057                    | 23                                       |                 |
|                                      |                              | Si wafer      |             | 0.047                    | 19                                       |                 |
|                                      |                              | Si material   |             | 0.06                     | 24                                       |                 |
|                                      |                              | total         |             | 0.26                     | 104                                      | $104 + C_{PSK}$ |
| Inverter                             |                              | 0.05          | 20          | $0.05 \times P_{tandem}$ |                                          |                 |
| Module type independent cost         | Wiring                       |               | 0.12        | 50                       |                                          |                 |
|                                      | Mounting                     |               | 0.091       | 37                       |                                          |                 |
|                                      | Ground                       |               | 0.050       | 20                       |                                          |                 |
|                                      | O&M cost per year            |               | 0.0065      | 2.6                      |                                          |                 |
|                                      | Total O&M cost over 25 years |               | 0.23        | 92                       |                                          |                 |
| Total Cost (\$)                      |                              |               | 1.05        | 425                      | $405 + 0.05 \times P_{tandem} + C_{PSK}$ |                 |

Table S4 Latitude and annual solar insolation in Perth in comparison with other cities in the world<sup>5</sup>.

| City                 | Latitude   | Annual Solar Insolation (kWh·m <sup>2</sup> ) |
|----------------------|------------|-----------------------------------------------|
| Perth, Australia     | 31.953° S  | 2133                                          |
| Los Angeles, US      | 34.054° N  | 2239                                          |
| Denver, US           | 39.739° N  | 1940                                          |
| Mexico City, Mexico  | 19.433° N  | 2187                                          |
| Berlin, Germany      | 52.5200° N | 1284                                          |
| Paris, France        | 48.857° N  | 1369                                          |
| Qinghai, China       | 36.000° N  | 1921                                          |
| Singapore, Singapore | 1.290° N   | 1735                                          |
| Riyadh, Saudi Arabia | 24.632° N  | 2494                                          |
| New Delhi, India     | 28.614° N  | 2139                                          |

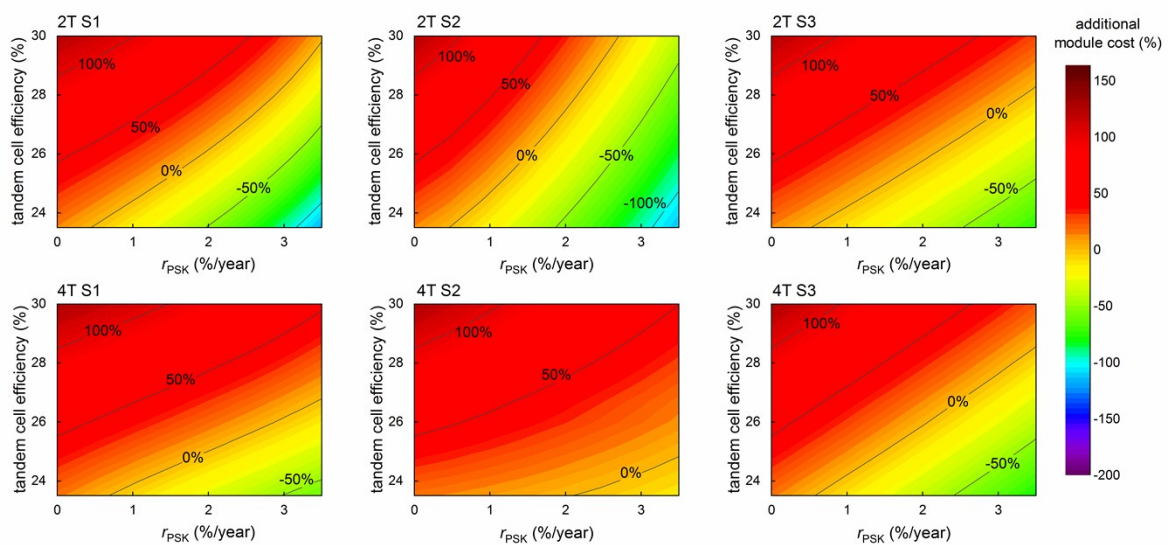

Figure S6 Simulated permissible  $C_{PSK}$  for 2T and 4T tandem modules in the three degradation scenarios (S1, S2 and S3) to breakeven with the mono c-Si PERC module in 2025. The encapsulation and Si cells in tandem modules and the 2025 PERC modules are assumed to degradation be 0.4% per year. A future energy discount rate of 5%/ year and a fixed  $f_{\tau}$  value of 0.89 is used.

## Reference

- 1 F. Sahli, J. Werner, B. A. Kamino, M. Bräuninger, R. Monnard, B. Paviet-Salomon, L. Barraud, L. Ding, J. J. Diaz Leon, D. Sacchetto, G. Cattaneo, M. Despeisse, M. Boccard, S. Nicolay, Q. Jeangros, B. Niesen and C. Ballif, *Nat. Mater.*, **17**, 820–826.
- 2 C. O. R. Quiroz, Y. Shen, M. Salvador, K. Forberich, N. Schrenker, G. D. Spyropoulos, T. Heumüller, B. Wilkinson, T. Kirchartz, E. Speicker, P. J. Verlinden, X. Zhang, M. A. Green, A. Ho-Baillie and C. J. Brabec, *J. Mater. Chem. A*, 2018, **6**, 3583-3592.
- 3 A. Jain and A. Kapoor, *Sol. Energy Mater. Sol. Cells*, 2004, **81**, 269-277.
- 4 ITRPV working group International technology roadmap for photovoltaic (ITRPV) - 2017 Results, Technical Report (March, 2018)
- 5 Photovoltaic Geographical Information System, [http://re.jrc.ec.europa.eu/pvg\\_tools/en/tools.html#HR](http://re.jrc.ec.europa.eu/pvg_tools/en/tools.html#HR), accessed March 2019
